# Supplementary material for: Conservation Implications of Changes in Endemic Hawaiian Drosophilidae Diversity across Land Use Gradients
Source: PLOS journal article supplement (doi:10.1371/journal.pone.0062464), 2013-05-01
Supplement: S1 (10.1371/journal.pone.0062464.s001) [file journal.pone.0062464.s001]

**Table S1: Complete List of Species Collected**

The following list is a compilation of every species of Drosophilidae collected during our study, with details on the number of sites in which each species was collected within each transect, and the cluster position of each species in Figures 10 and 11 in the main paper.

| Taxonomic groupings and species | Hawai'i                       |                                  |                                      |                        |                       |                       | Maui               |                                   |                             |                                   |
|---------------------------------|-------------------------------|----------------------------------|--------------------------------------|------------------------|-----------------------|-----------------------|--------------------|-----------------------------------|-----------------------------|-----------------------------------|
|                                 | % of total endemics (Hawai'i) | Stainback # endemic sites (of 4) | Stainback # non-endemic sites (of 5) | Saddle # sites (of 15) | Kohala # sites (of 6) | Waimea # sites (of 5) | Group on Figure 10 | % of total endemics (Maui forest) | Maui Forest # sites (of 38) | Kula orchard sites # sites (of 9) |

***Drosophila (Antopocerus)***

|                                       |       |   |  |   |   |  |   |      |    |  |   |
|---------------------------------------|-------|---|--|---|---|--|---|------|----|--|---|
| <i>D. adunca</i> Hardy, 1965          |       |   |  |   |   |  |   | 2.31 | 28 |  | C |
| <i>D. cognata</i> Grimshaw, 1901      | 1.71  | 4 |  | 7 | 3 |  | B |      |    |  |   |
| <i>D. diamphidopoda</i> (Hardy, 1965) |       |   |  |   |   |  |   | 3.63 | 36 |  | C |
| <i>D. orthoptera</i> (Hardy, 1965)    |       |   |  |   |   |  |   | 0.12 | 8  |  | C |
| <i>D. tanythrix</i> (Hardy, 1965)     | 37.16 | 4 |  | 9 | 6 |  | C |      |    |  |   |
| <i>D. villosa</i> (Hardy, 1965)       |       |   |  |   |   |  |   | 0.01 | 1  |  | C |
| <i>D. yooni</i> Hardy, 1977           | 0.34  |   |  | 4 |   |  | C |      |    |  |   |

***Drosophila (Bristle tarsus)***

|                                    |      |                |  |   |                |  |   |      |   |  |   |
|------------------------------------|------|----------------|--|---|----------------|--|---|------|---|--|---|
| <i>D. brunneisetae</i> Hardy, 1965 | 0.01 | 1 <sup>b</sup> |  |   |                |  | C | 0    |   |  |   |
| <i>D. expansa</i> Hardy, 1965      | 0    |                |  |   |                |  |   | 0.01 | 1 |  | C |
| <i>D. petalopeza</i> Hardy, 1965   |      |                |  |   |                |  |   | 0.04 | 3 |  | C |
| <i>D. trichetosa</i> Hardy, 1965   | 0.05 | 0 <sup>a</sup> |  | 2 | 0 <sup>a</sup> |  | C |      |   |  |   |

***Drosophila (Ciliate tarsus)***

|                                   |      |                |  |                |                |  |   |      |   |  |   |
|-----------------------------------|------|----------------|--|----------------|----------------|--|---|------|---|--|---|
| <i>D. imparisetae</i> Hardy, 1965 | 0.01 | 0 <sup>a</sup> |  | 1              | 0 <sup>a</sup> |  | C |      |   |  |   |
| <i>D. latigena</i> Hardy, 1965    | 0    | 0 <sup>a</sup> |  | 0 <sup>a</sup> | 0 <sup>a</sup> |  |   | 0.06 | 4 |  | C |
| <i>D. medialis</i> Hardy, 1966    | 0.18 | 0 <sup>a</sup> |  | 4              | 1              |  | C |      |   |  |   |
| <i>D. nigritarsus</i> Hardy, 1965 | 0.01 | 0 <sup>a</sup> |  | 1              |                |  | C |      |   |  |   |

***Drosophila (Split tarsus)***

|                                               |      |   |  |   |                |   |   |      |                 |  |   |
|-----------------------------------------------|------|---|--|---|----------------|---|---|------|-----------------|--|---|
| <i>D. ancyla</i> Hardy, 1965                  |      |   |  |   |                |   |   | 0.37 | 20              |  | C |
| <i>D. cnecopleura</i> Hardy, 1965             | 4.70 | 3 |  | 4 | 6              | 1 | C |      |                 |  |   |
| <i>D. cracens</i> Hardy, 1965                 | 0.00 |   |  |   |                |   |   | 0.01 | 1               |  | C |
| <i>D. fundita</i> Hardy, 1965                 |      |   |  |   |                |   |   | 0.06 | 6               |  | C |
| <i>D. paracracens</i> Hardy & Kaneshiro, 1979 | 0.30 |   |  | 3 | 2              |   | C |      |                 |  |   |
| <i>D. paucitarsus</i> Hardy & Kaneshiro, 1979 |      |   |  |   |                |   |   | 0.08 | 10 <sup>c</sup> |  | D |
| <i>D. proprio-facies</i> Hardy, 1965          | 0.71 |   |  | 3 | 0 <sup>a</sup> |   | C | 0.00 |                 |  |   |
| <i>D. variabilis</i> Hardy, 1965              |      |   |  |   |                |   |   | 0.48 | 19              |  | C |

| Taxonomic groupings and species | Hawai'i                       |                                  |                                      |                        |                       |                        | Maui               |                                   |                             |                                   |
|---------------------------------|-------------------------------|----------------------------------|--------------------------------------|------------------------|-----------------------|------------------------|--------------------|-----------------------------------|-----------------------------|-----------------------------------|
|                                 | % of total endemics (Hawai'i) | Stainback # endemic sites (of 4) | Stainback # non-endemic sites (of 5) | Saddle # sites (of 15) | Kohala # sites (of 6) | Waiimea # sites (of 5) | Group on Figure 10 | % of total endemics (Maui forest) | Maui Forest # sites (of 38) | Kula orchard sites # sites (of 9) |

***Drosophila (Split tarsus)***

|                                               |      |   |  |   |                |   |   |      |                 |  |   |
|-----------------------------------------------|------|---|--|---|----------------|---|---|------|-----------------|--|---|
| <i>D. ancyla</i> Hardy, 1965                  |      |   |  |   |                |   |   | 0.37 | 20              |  | C |
| <i>D. cneoppleura</i> Hardy, 1965             | 4.70 | 3 |  | 4 | 6              | 1 | C |      |                 |  |   |
| <i>D. cracens</i> Hardy, 1965                 | 0.00 |   |  |   |                |   |   | 0.01 | 1               |  | C |
| <i>D. fundita</i> Hardy, 1965                 |      |   |  |   |                |   |   | 0.06 | 6               |  | C |
| <i>D. paracracens</i> Hardy & Kaneshiro, 1979 | 0.30 |   |  | 3 | 2              |   | C |      |                 |  |   |
| <i>D. paucitarsus</i> Hardy & Kaneshiro, 1979 |      |   |  |   |                |   |   | 0.08 | 10 <sup>c</sup> |  | D |
| <i>D. proprio-facies</i> Hardy, 1965          | 0.71 |   |  | 3 | 0 <sup>a</sup> |   | C | 0.00 |                 |  |   |
| <i>D. variabilis</i> Hardy, 1965              |      |   |  |   |                |   |   | 0.48 | 19              |  | C |

***Drosophila (Spoon tarsus)***

|                                     |      |                |  |   |                |  |   |       |    |  |   |
|-------------------------------------|------|----------------|--|---|----------------|--|---|-------|----|--|---|
| <i>D. conformis</i> Hardy, 1965     | 1.86 | 3              |  | 2 | 0 <sup>a</sup> |  | C |       |    |  |   |
| <i>D. contorta</i> Hardy, 1965      |      |                |  |   |                |  |   | 0.01  | 1  |  | C |
| <i>D. dasyncnemias</i> Hardy, 1965  | 2.78 | 4              |  | 3 | 5              |  | C |       |    |  |   |
| <i>D. incognita</i> Hardy, 1965     | 0.01 | 1              |  |   |                |  | C |       |    |  |   |
| <i>D. mimiconformis</i> Hardy, 1965 |      |                |  |   |                |  |   | 0.01  | 2  |  | C |
| <i>D. neutralis</i> Hardy, 1965     | 6.78 | 4              |  | 3 | 6              |  | C |       |    |  |   |
| <i>D. percnosoma</i> Hardy, 1965    | 8.67 | 4              |  | 6 | 6              |  | C |       |    |  |   |
| <i>D. sordidapex</i> Grimshaw, 1901 | 0.84 | 4              |  | 4 | 3              |  | C |       |    |  |   |
| <i>D. waddingtoni</i> Basden, 1976  | 0.09 | 0 <sup>a</sup> |  | 2 | 0 <sup>a</sup> |  | C | 10.27 | 28 |  | C |

***Drosophila (Picture wing)***

|                                               |      |   |   |                |                |  |   |      |    |  |   |
|-----------------------------------------------|------|---|---|----------------|----------------|--|---|------|----|--|---|
| <i>D. adia-stola</i> Hardy, 1965              |      |   |   |                |                |  |   | 0.08 | 5  |  | C |
| <i>D. clavisetae</i> (Hardy, 1966)            |      |   |   |                |                |  |   | 0.01 | 2  |  | C |
| <i>D. cyrtoloma</i> Hardy, 1969               |      |   |   |                |                |  |   | 0.06 | 4  |  | C |
| <i>D. discreta</i> Hardy & Kaneshiro, 1968    |      |   |   |                |                |  |   | 0.11 | 12 |  | D |
| <i>D. disjuncta</i> Hardy, 1965               |      |   |   |                |                |  |   | 0.06 | 5  |  | C |
| <i>D. fasciculisetae</i> Hardy, 1965          |      |   |   |                |                |  |   | 1.54 | 27 |  | D |
| <i>D. grimshawi</i> Oldenberg, 1914           |      |   |   |                |                |  |   | 0.16 | 16 |  | D |
| <i>D. lanaiensis</i> Grimshaw, 1901           |      |   |   |                |                |  |   | 0.01 | 1  |  | D |
| <i>D. limitata</i> Hardy & Kaneshiro, 1968    |      |   |   |                |                |  |   | 0.24 | 11 |  | D |
| <i>D. melanocephala</i> (Hardy, 1966)         |      |   |   |                |                |  |   | 0.03 | 2  |  | C |
| <i>D. murphyi</i> Hardy & Kaneshiro, 1969     | 0.11 | 1 | 1 | 1              | 3              |  | C |      |    |  |   |
| <i>D. neopicta</i> Hardy & Kaneshiro, 1968    |      |   |   |                |                |  |   | 0.01 | 1  |  | C |
| <i>D. obscuripes</i> (Grimshaw, 1901)         |      |   |   |                |                |  |   | 0.01 | 1  |  | C |
| <i>D. ochracea</i> Grimshaw, 1901             | 1.08 | 4 | 4 | 0 <sup>a</sup> | 0 <sup>a</sup> |  | C |      |    |  |   |
| <i>D. orphnopeza</i> Hardy & Kaneshiro, 1968  |      |   |   |                |                |  |   | 0.12 | 9  |  | D |
| <i>D. pilatisetae</i> Hardy & Kaneshiro, 1968 |      |   |   |                |                |  |   | 0.03 | 4  |  | D |
| <i>D. planitibia</i> (Hardy, 1966)            |      |   |   |                |                |  |   | 0.19 | 11 |  | D |
| <i>D. recticilia</i> Hardy & Kaneshiro, 1968  |      |   |   |                |                |  |   | 0.17 | 11 |  | C |
| <i>D. silvestris</i> (Perkins, 1910)          | 0.13 |   |   | 3              |                |  | C |      |    |  |   |
| <i>D. sproati</i> Hardy & Kaneshiro, 1968     | 0.34 | 2 |   | 1              | 5              |  | C |      |    |  |   |

| Taxonomic groupings and species | Hawai'i                       |                                  |                                      |                        |                       |                       |                    | Maui                              |                             |                                   |                    |
|---------------------------------|-------------------------------|----------------------------------|--------------------------------------|------------------------|-----------------------|-----------------------|--------------------|-----------------------------------|-----------------------------|-----------------------------------|--------------------|
|                                 | % of total endemics (Hawai'i) | Stainback # endemic sites (of 4) | Stainback # non-endemic sites (of 5) | Saddle # sites (of 15) | Kohala # sites (of 6) | Waimea # sites (of 5) | Group on Figure 10 | % of total endemics (Maui forest) | Maui Forest # sites (of 38) | Kula orchard sites # sites (of 9) | Group on Figure 11 |

***Drosophila (haleakalae)***

|                                                |      |                |   |                |                |   |   |
|------------------------------------------------|------|----------------|---|----------------|----------------|---|---|
| <i>D. bipolita</i> Hardy, 1965                 | 3.04 | 4              | 2 | 4              | 2              | 1 | C |
| <i>D. brunneicrus</i> Hardy & Kaneshiro, 2001  | 0.04 |                |   | 1              |                |   | C |
| <i>D. canipolita</i> Hardy, 1965               | 0.12 | 0 <sup>a</sup> |   | 2              |                |   | C |
| <i>D. cilifemorata</i> Hardy, 1965             | 0.05 | 0 <sup>a</sup> |   | 1              | 0 <sup>a</sup> |   | C |
| <i>D. demipolita</i> Hardy, 1965               | 0.20 |                |   | 4              |                |   | C |
| <i>D. dolichotarsis</i> Hardy, 1966            |      |                |   |                |                |   |   |
| <i>D. fungiperda</i> Hardy, 1965               | 0.16 | 0 <sup>a</sup> |   | 4              |                |   | C |
| <i>D. fuscifrons</i> Hardy, 1965               |      |                |   |                |                |   |   |
| <i>D. iki</i> Bryan, 1934                      | 0.00 |                |   |                |                |   |   |
| <i>D. illusipolita</i> Hardy, 1965             | 0.24 | 4              |   |                | 0 <sup>a</sup> |   | C |
| <i>D. inciliata</i> Hardy & Kaneshiro, 1968    |      |                |   |                |                |   |   |
| <i>D. longiperda</i> Kambysellis, 1993         | 0.17 |                |   | 5              | 0 <sup>a</sup> |   | C |
| <i>D. macrochaetae</i> Hardy, 1965             | 0.28 |                |   | 4 <sup>b</sup> |                |   | C |
| <i>D. melanoloma</i> Hardy, 1965               |      |                |   |                |                |   |   |
| <i>D. multiciliata</i> Hardy & Kaneshiro, 2001 | 1.05 | 1              |   | 6              |                |   | C |
| <i>D. nigella</i> Hardy, 1965                  |      |                |   |                |                |   |   |
| <i>D. nigra</i> Grimshaw, 1901                 |      |                |   |                |                |   |   |
| <i>D. ochropleura</i> Hardy & Kaneshiro, 2001  | 0.36 |                |   | 4              |                |   | C |
| <i>D. polita</i> Grimshaw, 1901                | 0.00 |                |   |                | 0 <sup>a</sup> |   |   |
| <i>D. quinquerosa</i> Hardy & Kaneshiro, 2001  |      |                |   |                |                |   |   |
| <i>D. stenoptera</i> Hardy, 1965               |      |                |   |                |                |   |   |

|       |                |   |   |
|-------|----------------|---|---|
| 3.36  | 21             |   | C |
| 1.86  | 33             |   | D |
| 0.00  | 0 <sup>a</sup> |   |   |
| 0.23  | 14             |   | C |
| 0.20  | 9              | 2 | D |
| 1.72  | 33             |   | C |
| 0.20  | 16             |   | C |
| 0.00  | 0 <sup>a</sup> |   |   |
| 0.04  | 3              |   | C |
| 23.24 | 37             |   | D |
| 2.15  | 29             |   | C |
| 0.03  | 3              | 2 | D |
| 0.04  | 4              | 2 | D |
| 0.01  | 1              |   | C |

***Drosophila (Modified mouthparts)***

|                                             |      |                |   |                |                |  |   |
|---------------------------------------------|------|----------------|---|----------------|----------------|--|---|
| <i>D. comatifemora</i> Hardy, 1965          |      |                |   |                |                |  |   |
| <i>D. desallei</i> Magnacca & O'Grady, 2009 | 0.11 |                |   | 3              | 3              |  | C |
| <i>D. furva</i> Hardy, 1965                 |      |                |   |                |                |  |   |
| <i>D. hirtitarsus</i> Hardy, 1965           |      |                |   |                |                |  |   |
| <i>D. infuscata</i> Grimshaw, 1901          | 0.24 | 2              | 2 | 0 <sup>a</sup> | 3              |  | C |
| <i>D. mitchelli</i> Hardy, 1965             | 0.03 | 0 <sup>a</sup> |   | 0 <sup>a</sup> | 1              |  | C |
| <i>D. nigrocirrus</i> Hardy, 1965           | 0.08 | 0 <sup>a</sup> |   | 2              | 0 <sup>a</sup> |  | C |

|      |    |   |   |
|------|----|---|---|
| 6.15 | 30 |   | D |
| 0.01 | 1  |   | C |
| 0.71 | 26 | 1 | D |

***Drosophila (Nudidrosophila)***

|                                            |      |   |  |   |  |  |   |
|--------------------------------------------|------|---|--|---|--|--|---|
| <i>D. makawao</i> Magnacca & O'Grady, 2008 |      |   |  |   |  |  |   |
| <i>D. pohaka</i> Magnacca & O'Grady, 2008  | 0.46 | 3 |  | 3 |  |  | C |

|      |    |  |   |
|------|----|--|---|
| 0.67 | 21 |  | D |
| 0.00 |    |  |   |

| Taxonomic groupings and species | Hawai'i                       |                                  |                                      |                        |                       |                       | Maui               |                                   |                             |                                   |
|---------------------------------|-------------------------------|----------------------------------|--------------------------------------|------------------------|-----------------------|-----------------------|--------------------|-----------------------------------|-----------------------------|-----------------------------------|
|                                 | % of total endemics (Hawai'i) | Stainback # endemic sites (of 4) | Stainback # non-endemic sites (of 5) | Saddle # sites (of 15) | Kohala # sites (of 6) | Waimea # sites (of 5) | Group on Figure 10 | % of total endemics (Maui forest) | Maui Forest # sites (of 38) | Kula orchard sites # sites (of 9) |

***Drosophila (unplaced)***

|                              |  |  |  |  |  |  |  |  |  |  |  |
|------------------------------|--|--|--|--|--|--|--|--|--|--|--|
| <i>D. joycei</i> Hardy, 1965 |  |  |  |  |  |  |  |  |  |  |  |
|------------------------------|--|--|--|--|--|--|--|--|--|--|--|

|      |   |  |   |
|------|---|--|---|
| 0.06 | 5 |  | C |
|------|---|--|---|

***Scaptomyza (Alloscaptomyza)***

|                                 |      |  |  |                |  |  |  |  |  |  |   |
|---------------------------------|------|--|--|----------------|--|--|--|--|--|--|---|
| <i>S. buccata</i> Hackman, 1962 | 0.00 |  |  |                |  |  |  |  |  |  |   |
| <i>S. mutica</i> Hardy, 1965    | 0.13 |  |  | 2 <sup>b</sup> |  |  |  |  |  |  | D |

|      |                |   |   |
|------|----------------|---|---|
| 0.17 | 15             | 1 | C |
| 0.00 | 0 <sup>a</sup> |   |   |

***Scaptomyza (Bunostoma)***

|                                    |      |  |  |  |                |   |  |  |  |  |   |
|------------------------------------|------|--|--|--|----------------|---|--|--|--|--|---|
| <i>S. bryanti</i> Hackman, 1959    | 0.00 |  |  |  |                |   |  |  |  |  |   |
| <i>S. confusa</i> Hardy, 1965      |      |  |  |  |                |   |  |  |  |  |   |
| <i>S. palmae</i> Hardy, 1965       |      |  |  |  | 0 <sup>a</sup> | 1 |  |  |  |  | D |
| <i>S. xanthopleura</i> Hardy, 1965 |      |  |  |  |                |   |  |  |  |  |   |

|      |                |                |   |
|------|----------------|----------------|---|
| 0.04 | 4              |                | C |
| n.a. |                | 3              | B |
| 0.01 | 2 <sup>c</sup> | 3 <sup>c</sup> | D |

***Scaptomyza (Elmomyza)***

|                                               |      |                |                |                |                |   |  |  |  |  |   |
|-----------------------------------------------|------|----------------|----------------|----------------|----------------|---|--|--|--|--|---|
| <i>S. affinispidata</i> Hardy, 1965           |      |                |                |                |                |   |  |  |  |  |   |
| <i>S. articulata</i> Hardy, 1965              | 0.00 |                |                | 0 <sup>a</sup> |                |   |  |  |  |  |   |
| <i>S. basiloba</i> Hardy, 1965                | 0.00 |                |                | 0 <sup>a</sup> |                |   |  |  |  |  |   |
| <i>S. concinna</i> Hardy, 1965                |      |                |                |                |                |   |  |  |  |  |   |
| <i>S. cryptoloba</i> Hardy, 1965              | 8.76 | 4 <sup>b</sup> | 2 <sup>b</sup> | 9 <sup>b</sup> | 6 <sup>b</sup> |   |  |  |  |  | C |
| <i>S. cuspidata</i> Hardy, 1965               | 0.00 | 0 <sup>a</sup> |                |                |                |   |  |  |  |  |   |
| <i>S. cyrtandrae</i> Hardy, 1965              | 0.22 | 1              |                | 1              |                |   |  |  |  |  | C |
| <i>S. decepta</i> Hardy, 1965                 |      |                |                |                |                |   |  |  |  |  |   |
| <i>S. diaphorocerca</i> Hardy, 1965           |      |                |                |                |                |   |  |  |  |  |   |
| <i>S. domita</i> Hardy, 1965                  |      |                |                |                |                |   |  |  |  |  |   |
| <i>S. exigua</i> (Grimshaw, 1901)             | 9.14 |                |                | 11             | 2              |   |  |  |  |  | C |
| <i>S. hackmani</i> Hardy, 1965                | 0.09 |                |                | 3              | 0 <sup>a</sup> |   |  |  |  |  | C |
| <i>S. inaequalis</i> (Grimshaw, 1901)         | 4.74 | 0 <sup>a</sup> |                | 7              |                |   |  |  |  |  | D |
| <i>S. intricata</i> Hardy, 1965               |      |                |                |                |                |   |  |  |  |  |   |
| <i>S. levata</i> Hardy, 1965                  | 0.00 |                |                |                | 0 <sup>a</sup> |   |  |  |  |  |   |
| <i>S. lobifera</i> Hardy, 1965                | 0.01 |                |                |                | 1              | 3 |  |  |  |  | D |
| <i>S. longipecten griseonigra</i> Hardy, 1965 |      |                |                |                |                |   |  |  |  |  |   |
| <i>S. ochromata</i> Hardy, 1965               |      |                |                |                |                |   |  |  |  |  |   |
| <i>S. retusa</i> Hardy, 1965                  |      |                |                |                |                |   |  |  |  |  |   |
| <i>S. silvicola</i> Hardy, 1965               | 0.00 |                |                |                |                |   |  |  |  |  |   |
| <i>S. tumidula</i> Hardy, 1965                | 0.67 |                |                | 9              |                |   |  |  |  |  | C |
| <i>S. umbrosa</i> Hardy, 1965                 | 0.00 |                |                |                |                |   |  |  |  |  |   |

|       |                 |                |   |
|-------|-----------------|----------------|---|
| 0.05  | 4               |                | C |
| 0.02  | 2 <sup>c</sup>  |                | D |
| 3.23  | 17 <sup>d</sup> |                | C |
| 0.04  | 3               |                | C |
| 0.00  |                 |                |   |
| 0.08  | 7               |                | C |
| 7.13  | 30              | 2              | C |
| 0.04  | 4 <sup>c</sup>  | 1 <sup>c</sup> | C |
| 0.01  | 1               |                | D |
| 0.00  | 0 <sup>a</sup>  |                |   |
| 0.01  | 1               | 1              | C |
| 0.00  | 0 <sup>a</sup>  |                |   |
| 1.55  | 24              |                | C |
| n.a.  |                 | 1 <sup>c</sup> | B |
| 0.01  | 1               |                | C |
| 13.14 | 37              |                | C |
| 0.01  | 1               |                | C |
| 0.64  | 19              |                | C |
| 0.01  | 2               |                | C |

| Taxonomic groupings and species             | Hawai'i                       |                                  |                                      |                        |                       |                        |                    | Maui                              |                             |                                   |                    |
|---------------------------------------------|-------------------------------|----------------------------------|--------------------------------------|------------------------|-----------------------|------------------------|--------------------|-----------------------------------|-----------------------------|-----------------------------------|--------------------|
|                                             | % of total endemics (Hawai'i) | Stainback # endemic sites (of 4) | Stainback # non-endemic sites (of 5) | Saddle # sites (of 15) | Kohala # sites (of 6) | Waiamea # sites (of 5) | Group on Figure 10 | % of total endemics (Maui forest) | Maui Forest # sites (of 38) | Kula orchard sites # sites (of 9) | Group on Figure 11 |
| <b><i>Scaptomyza (Engiscaptomyza)</i></b>   |                               |                                  |                                      |                        |                       |                        |                    |                                   |                             |                                   |                    |
| <i>S. crassifemur</i> (Grimshaw, 1901)      |                               |                                  |                                      |                        |                       |                        |                    | 12.77                             | 35                          | 1                                 | C                  |
| <i>S. nasalis</i> (Grimshaw, 1901)          |                               |                                  |                                      |                        |                       |                        |                    | 0.04                              | 3                           | 1                                 | C                  |
| <b><i>Scaptomyza (Exalloscaptomyza)</i></b> |                               |                                  |                                      |                        |                       |                        |                    |                                   |                             |                                   |                    |
| <i>S. mauiensis</i> (Grimshaw, 1901)        |                               |                                  |                                      |                        |                       |                        |                    | 0.01                              | 1                           | 2                                 | B                  |
| <b><i>Scaptomyza (Grimshawomyia)</i></b>    |                               |                                  |                                      |                        |                       |                        |                    |                                   |                             |                                   |                    |
| <i>S. undulata</i> (Grimshaw, 1901)         | 1.38                          | 1                                |                                      | 7                      |                       |                        | C                  |                                   |                             |                                   |                    |
| <b><i>Scaptomyza (Tantalia)</i></b>         |                               |                                  |                                      |                        |                       |                        |                    |                                   |                             |                                   |                    |
| <i>S. brunnimaculata</i> Hardy, 1965        |                               |                                  |                                      |                        |                       |                        |                    | 0.01                              | 1 <sup>c</sup>              |                                   | C                  |
| <i>S. nigrosignata</i> Hardy, 1965          | 0.00                          |                                  |                                      |                        |                       |                        |                    | 0.01                              | 1 <sup>c</sup>              |                                   | D                  |
| <b><i>Scaptomyza (Titanochaeta)</i></b>     |                               |                                  |                                      |                        |                       |                        |                    |                                   |                             |                                   |                    |
| <i>S. bryani</i> (Wirth, 1952)              | 0.00                          |                                  |                                      |                        | 0 <sup>a</sup>        |                        |                    | 0.03                              | 4                           |                                   | C                  |
| <i>S. chauliodon</i> (Hardy, 1965)          | 0.01                          |                                  |                                      | 1 <sup>b</sup>         |                       | 1 <sup>b</sup>         | C                  | 0.01                              | 1                           |                                   | D                  |
| <i>S. setosiscutellum</i> (Hardy, 1965)     | 0.00                          |                                  |                                      |                        | 0 <sup>a</sup>        |                        |                    | 0.04                              | 5 <sup>c</sup>              |                                   | C                  |
| <b><i>Scaptomyza (Unplaced)</i></b>         |                               |                                  |                                      |                        |                       |                        |                    |                                   |                             |                                   |                    |
| <i>S. parva</i> (Grimshaw, 1901)            | 0.30                          | 4                                |                                      | 4                      | 4                     |                        | C                  |                                   |                             |                                   |                    |

| Taxonomic groupings and species | Hawai'i                       |                                  |                                      |                        |                       |                       |
|---------------------------------|-------------------------------|----------------------------------|--------------------------------------|------------------------|-----------------------|-----------------------|
|                                 | % of total endemics (Hawai'i) | Stainback # endemic sites (of 4) | Stainback # non-endemic sites (of 5) | Saddle # sites (of 15) | Kohala # sites (of 6) | Waimea # sites (of 5) |

| Taxonomic groupings and species | Maui                              |                             |                                   |
|---------------------------------|-----------------------------------|-----------------------------|-----------------------------------|
|                                 | % of total endemics (Maui forest) | Maui Forest # sites (of 38) | Kula orchard sites # sites (of 9) |

### Introduced Drosophilidae

|                                                                                         |  |   |   |    |   |   |   |
|-----------------------------------------------------------------------------------------|--|---|---|----|---|---|---|
| <i>Cacoxenus perspicax</i> (Knab, 1914)                                                 |  |   |   |    |   |   |   |
| <i>Chymomyza procnemis</i> (Williston, 1896)                                            |  |   |   |    |   |   |   |
| <i>Dettopsomyia nigrovittata</i> (Malloch, 1924)                                        |  |   |   |    | 1 | 1 | C |
| <i>D. ananassae</i> Doleschall, 1858 and/or <i>D. kikkawai</i> Burla, 1954              |  |   | 4 | 1  | 1 |   | A |
| <i>D. bizonata</i> Kikkawa & Peng, 1938                                                 |  |   |   |    | 3 | 5 | D |
| <i>D. busckii</i> Coquillett, 1901                                                      |  |   | 2 |    | 5 | 3 | B |
| <i>D. cardini</i> Sturtevant, 1916                                                      |  |   |   |    |   | 1 | D |
| <i>D. hydei</i> Sturtevant, 1921                                                        |  |   |   |    |   |   | D |
| <i>D. immigrans</i> Sturtevant, 1921                                                    |  | 4 | 5 | 8  | 6 | 4 | A |
| <i>D. lutzii</i> Sturtevant, 1916                                                       |  |   |   | 3  | 2 | 3 | D |
| <i>D. melanogaster</i> Meigen, 1830                                                     |  | 1 | 2 |    |   | 1 |   |
| <i>D. quadrilineata</i> deMejeire, 1911                                                 |  | 2 | 3 |    | 5 | 2 |   |
| <i>D. repleta</i> Wollaston, 1858 and/or <i>D. mercatorum</i> Patterson & Wheeler, 1942 |  |   |   |    |   |   |   |
| <i>D. simulans</i> Sturtevant, 1919                                                     |  | 1 | 1 |    | 1 | 3 | C |
| <i>D. sulfurigaster bilimbata</i> Bezzi, 1928                                           |  | 3 | 5 | 6  | 2 | 4 | A |
| <i>D. suzukii</i> (Matsumara, 1931)                                                     |  | 4 | 5 | 15 | 6 | 5 | B |
| <i>Hirtodrosophila</i> sp. nr. <i>unicolorata</i> Wheeler, 1959                         |  |   |   | 4  | 3 | 2 | C |
| <i>Leucophenga maculosa</i> (Coquillett, 1895)                                          |  |   | 1 | 1  | 1 | 3 | C |
| <i>Scaptodrosophila</i> sp                                                              |  |   | 2 |    |   |   | D |
| <i>Scaptomyza elmoi</i> Takada, 1970                                                    |  |   |   | 1  | 5 | 3 | B |
| <i>Zaprionus ghesquierei</i> Collart, 1937                                              |  |   | 2 |    |   |   | D |

|  |    |   |   |
|--|----|---|---|
|  |    | 3 | B |
|  | 1  | 7 | B |
|  |    |   |   |
|  |    |   |   |
|  | 8  | 7 | A |
|  | 31 | 9 | D |
|  |    | 3 | B |
|  |    |   | B |
|  | 19 | 8 | D |
|  | 12 | 7 | B |
|  |    | 4 | B |
|  | 4  | 1 | D |
|  |    |   |   |
|  |    | 5 | B |
|  |    | 6 | B |
|  | 1  | 1 | C |
|  | 37 | 8 | D |
|  |    |   |   |
|  | 2  | 3 | B |
|  | 2  | 9 | B |
|  |    |   |   |
|  | 8  | 5 | C |
|  | 1  | 6 | B |

<sup>a</sup> Known to be present in sampled area but not collected during our surveys

<sup>b</sup> New island record for Hawai'i Island

<sup>c</sup> New island record for Maui Island

<sup>d</sup> *S. basiloba* is a new island record for Maui Island, or it may be an undescribed closely related species
